# Supplementary material
Source: ML conference proceedings conference paper supplement (https://proceedings.neurips.cc/paper_files/paper/2018/hash/351869bde8b9d6ad1e3090bd173f600d-Abstract.html)
Supplement: Supplementary file [file 351869bde8b9d6ad1e3090bd173f600d-Supplemental.zip]

---

# Supplementary material for 'Graphical model inference: Sequential Monte Carlo meets deterministic approximations'

---

**Fredrik Lindsten**  
Department of Information Technology  
Uppsala University  
Uppsala, Sweden  
fredrik.lindsten@it.uu.se

**Jouni Helske**  
Department of Science and Technology  
Linköping University  
Norrköping, Sweden  
jouni.helske@liu.se

**Matti Vihola**  
Department of Mathematics and Statistics  
University of Jyväskylä  
Jyväskylä, Finland  
matti.s.vihola@jyu.fi

## Abstract

This is supplementary material for the paper 'Graphical model inference: Sequential Monte Carlo meets deterministic approximations'. We give proofs of two propositions and provide additional details about regularized twisting, the Gaussian Markov random field application, and the topic model evaluation. We also provide a self-contained proof of the unbiasedness of the normalizing constant estimate.

## 1 Proofs

### 1.1 Proof of Proposition 1

Selecting  $\psi_t(x_{1:t}) = \psi_t^*(x_{1:t}) = \int \prod_{j \in \mathcal{F} \setminus \mathcal{F}_t} f_j(x_{\mathcal{I}_j}) dx_{t+1:T}$  results in

$$\gamma_t^\psi(x_{1:t}) = \prod_{j \in \mathcal{F}_t} f_j(x_{\mathcal{I}_j}) \int \prod_{j \in \mathcal{F} \setminus \mathcal{F}_t} f_j(x_{\mathcal{I}_j}) dx_{t+1:T}.$$

Consequently,

$$\frac{\gamma_t^\psi(x_{1:t})}{\gamma_{t-1}^\psi(x_{1:t-1})} = \prod_{j \in \mathcal{F}_t} f_j(x_{\mathcal{I}_j}) \frac{\int \prod_{j \in \mathcal{F} \setminus \mathcal{F}_t} f_j(x_{\mathcal{I}_j}) dx_{t+1:T}}{\int \prod_{j \in \mathcal{F} \setminus \mathcal{F}_{t-1}} f_j(x_{\mathcal{I}_j}) dx_{t:T}}.$$

This expression integrates to 1, and the locally optimal proposal (given by Eq. (2) in the main paper) is therefore given by  $q_t(x_t | x_{1:t-1}) = \gamma_t^\psi(x_{1:t}) / \gamma_{t-1}^\psi(x_{1:t-1})$  for  $t \geq 2$ . For  $t = 1$  we get  $q_1(x_1) \propto \gamma_1^\psi(x_1) = \int \prod_{j \in \mathcal{F}} f_j(x_{\mathcal{I}_j}) dx_{2:T}$ , which implies  $q_1(x_1) = Z^{-1} \gamma_1^\psi(x_1)$ .

We thus get  $\tilde{w}_1^i \equiv Z$  and  $\omega_t(x_{1:t}) \equiv 1$  for  $t \geq 2$  and thus  $\hat{Z}_T = Z$ . Furthermore, this implies that all normalized weights are  $\frac{1}{N}$  and the resampling step will therefore not alter the marginal distributions of the particle trajectories. The final particle trajectories are therefore distributed according to

$$q_1(x_1) \prod_{t=2}^T q_t(x_t | x_{t-1}) = \frac{\gamma_1^\psi(x_1)}{Z} \prod_{t=2}^T \frac{\gamma_t^\psi(x_{1:t})}{\gamma_{t-1}^\psi(x_{1:t-1})} = \pi(x_{1:T}).$$

In fact, since all importance weights are equal there is no need for resampling. Equivalently, if we use a low-variance resampling method (such as stratified or systematic) then the resampling step will output exactly one copy of each particle, and the resampling is effectively turned off. This implies that the  $N$  final trajectories  $\{x_{1:T}^i\}_{i=1}^N$  are i.i.d. draws from  $\pi$ .

## 1.2 Proof of Proposition 2

For a tree-structured factor graph, let  $\mathcal{F}_j^{\setminus s}$  denote the set of factors in the subtree, containing factor  $f_j$ , obtained by removing the edge between factor  $f_j$  and variable  $x_s$ . Furthermore, let  $X_j^{\setminus s}$  denote all the variables contained in this subtree. It then holds (see, e.g., [1]) that

$$\mu_{j \rightarrow s}(x_s) = \int \prod_{i \in \mathcal{F}_j^{\setminus s}} f_i(x_{I_i}) dX_j^{\setminus s}. \quad (1)$$

Now, let  $t$  be a fixed iteration index. By assumption the sub-graph with variable nodes  $\{1, \dots, t\}$  and factor nodes  $\{f_j : j \in \mathcal{F}_t\}$  is a tree. Since the complete model is also assumed to be a tree, this implies that any factor  $j \in \mathcal{F} \setminus \mathcal{F}_t$  is connected to at most one variable node in  $\{1, \dots, t\}$ . Specifically, let  $\mathcal{J} \subset \mathcal{F} \setminus \mathcal{F}_t$  denote the set of factors such that there exists an edge between  $j \in \mathcal{J}$  and some variable  $s_j \in \{1, \dots, t\}$ .

It then follows that the the optimal twisting function (Eq. (6) in the main paper) can be factorized as

$$\begin{aligned} \psi_t^*(x_{1:t}) &= \int \prod_{j \in \mathcal{F} \setminus \mathcal{F}_t} f_j(x_{I_j}) dx_{t+1:T} \\ &= \prod_{j \in \mathcal{J}} \int \prod_{i \in \mathcal{F}_j^{\setminus s_j}} f_i(x_{I_i}) dX_j^{\setminus s_j} \\ &= \prod_{j \in \mathcal{J}} \mu_{j \rightarrow s_j}(x_{s_j}). \end{aligned}$$

However, by the definition of  $\mu_{j \rightarrow (1:t)}(x_{1:t})$  it also holds, for a tree-structured graph, that

$$\mu_{j \rightarrow (1:t)}(x_{1:t}) = \begin{cases} \mu_{j \rightarrow s_j}(x_{s_j}) & \text{if } j \in \mathcal{J}, \\ 1 & \text{otherwise,} \end{cases}$$

which completes the proof.

## 2 Implementation details for topic model evaluation

In this section we present additional details on the model and implementation used in Section 6.2 of the main paper. Matlab code is available on GitHub<sup>1</sup>.

The LDA model is given by

$$\pi(\theta, x_{1:T}) \propto \text{Dir}(\theta \mid \alpha) \prod_{t=1}^T \theta_{x_t} \Phi_{w_t x_t} \quad (2)$$

where  $\text{Dir}(\theta \mid \alpha)$  is a  $K$ -dimensional Dirichlet prior over the topic distribution  $\theta$ . The words of the document,  $w_1, \dots, w_T$ , are encoded as integers in  $\{1, \dots, V\}$ , where  $V$  is the size of the vocabulary. The variable  $x_t \in \{1, \dots, K\}$  is the (latent) topic of word  $w_t$ , and  $\Phi_{:,k}$  is the probability vector over words for topic  $k$ . For model evaluation we assume that the word distributions  $\Phi$  and the concentration parameter for the topic distribution prior  $\alpha$  are known (pre-learned), whereas the topic distribution vector  $\theta$  as well as the topics  $x_{1:T}$  are latent. See [11] for additional details on the model.

The task is to compute the normalizing constant of (2). To this end, Minka and Lafferty [6] proposed an EP algorithm which works as follows. First we marginalize the latent topics,

$$\pi(\theta) \propto \text{Dir}(\theta \mid \alpha) \prod_{t=1}^T \left\{ \sum_{k=1}^K \theta_k \Phi_{w_t k} \right\} = \text{Dir}(\theta \mid \alpha) \prod_{w=1}^V \left\{ \sum_{k=1}^K \theta_k \Phi_{wk} \right\}^{n_w}, \quad (3)$$

<sup>1</sup><https://github.com/freli005/smc-pgm-twist>

where  $n_w$  is the number of occurrences of word  $w$  in the document. Next, we introduce approximate factors

$$\sum_{k=1}^K \theta_k \Phi_{wk} \approx s_w \prod_{k=1}^K \theta_k^{\beta_{wk}}, \quad (4)$$

where the  $s_w$ 's and  $\beta_{wk}$ 's are updated one word at a time by moment matching, until convergence. These updates are not guaranteed to result in a proper approximate distribution, so therefore Minka and Lafferty [6] propose to skip any update that results in an improper approximation and simply continue with the next word.

For the twisted SMC algorithm we obtain the following expression for the optimal twisting functions:

$$\psi_t^*(\theta, x_{1:t}) = \psi_t^*(\theta) = \sum_{x_{t+1:T}} \prod_{s=t+1}^T \theta_{x_s} \Phi_{w_s x_s} = \prod_{s=t+1}^T \left\{ \sum_{k=1}^K \theta_k \Phi_{w_s k} \right\}. \quad (5)$$

Thus, we can naturally use the EP approximation (4) to define

$$\psi_t(\theta) = \prod_{s=t+1}^T \prod_{k=1}^K \theta_k^{\beta_{w_s k}}. \quad (6)$$

Combining this with the non-twisted (unnormalized) target  $\gamma_t(\theta, x_{1:t}) = \text{Dir}(\theta \mid \alpha) \prod_{s=1}^t \theta_{x_s} \Phi_{w_s x_s}$  we get the twisted target  $\gamma_t^\psi(\theta, x_{1:t}) = \text{Dir}(\theta \mid g_t) \prod_{s=1}^t \theta_{x_s} \Phi_{w_s x_s}$  where  $g_t = \alpha + \sum_{s=1}^t \beta_{w_s, \cdot}$ . To ensure proper intermediate targets for the SMC sampler we extend the safety-check mentioned above, and only apply an EP update if all resulting  $g_t$ 's are positive. We have found that running the EP updates in reverse order, from  $t = T$  to  $t = 1$ , resulted in few skipped updates.

Finally, similarly to [7] we run a Rao-Blackwellized SMC sampler and analytically marginalize  $\theta$  conditionally on  $x_{1:t}$  for each particle  $\{x_{1:t}^i\}_{i=1}^N$ .

### 3 Implementation details for latent Gaussian Markov field evaluation

In this section we present additional details on the latent Gaussian Markov random field (GMRF) model of Section 4.3 of the main paper. An R package for obtaining the results of Section 6.3 is also available on GitHub<sup>2</sup>.

Let  $y_t | x_1, \dots, x_T \sim p(y_t | x_t)$ , where  $x = (x_1, \dots, x_T)^\top$  is a GMRF with prior mean vector  $\mu$  and precision matrix  $Q$ . For simplicity, we assume that each  $y_t$  and  $x_t$  is univariate, and that  $p(y_t | x_t)$  belongs to the exponential family (see [9] for more general treatment of obtaining Laplace approximations for latent GMRF models). Then

$$p(x|y) \propto \exp \left( -\frac{1}{2} (x - \mu)^\top Q (x - \mu) + \sum_{t=1}^T \log p(y_t | x_t) \right).$$

Now we use second-order Taylor approximation of  $\sum_{t=1}^T \log p(y_t | x_t)$  around  $\tilde{x}$ . Denote  $\dot{\xi}(\tilde{x}_t)$  as the value of the first derivative of  $\log p(y_t | z)$  w.r.t.  $z$  at  $z = \tilde{x}_t$ , and similarly  $\ddot{\xi}(\tilde{x}_t)$  for the second derivative. Then

$$\begin{aligned} \tilde{p}(x|y) &\propto \exp \left( -\frac{1}{2} x^\top Q x + \mu^\top Q x + \sum_{t=1}^T (a_t + b_t x_t - \frac{1}{2} c_t x_t^2) \right) \\ &\propto \exp \left( -\frac{1}{2} x^\top (Q + \text{diag}(c)) x + (Q\mu + b)^\top x \right), \end{aligned}$$

<sup>2</sup><https://github.com/helske/particlefield>

where

$$\begin{aligned} a_t &= \log p(y_t | \tilde{x}_t) - b_t \tilde{x}_t + \frac{1}{2} c_t \tilde{x}_t^2, \\ b_t &= \dot{\xi}(\tilde{x}_t) + c_t \tilde{x}_t, \\ c_t &= -\ddot{\xi}(\tilde{x}_t). \end{aligned}$$

Now given our guess  $\tilde{x}$ , we have a Gaussian approximation of the posterior density of  $x$ , given as a canonical parametrization  $\mathcal{N}_c(Q\mu + b, Q + \text{diag}(c))$ . Next we can expand again using the point  $Q\mu + b$ , and repeat until convergence. This gives as an approximating Gaussian model with posterior precision matrix  $\tilde{Q} = Q + \text{diag}(\hat{c})$  and mean vector  $\tilde{\mu} = Q\mu + \hat{b}$ , with the same posterior mode  $\hat{x}$  as our original model. We follow [10, 4] and use  $\tilde{Z}p(y|\hat{x})/\tilde{p}(y|\hat{x})$  as an approximate likelihood, where  $\tilde{Z}$  is the likelihood of the approximating model, and the ratio term is an approximation of  $\mathbb{E}[p(y|x)/\tilde{p}(y|x)]$ .

For twisted SMC we define the observational level densities as  $\tilde{p}(y_t | x_t) = \exp(\hat{a}_t + \hat{b}_t x_t - \frac{1}{2} \hat{c}_t x_t^2)$ , and sample from  $\tilde{p}(x_t | x_{1:t-1}, y_{1:T})$ . In order to sample from this distribution, we will first order  $x$  from last to first for easier bookkeeping, i.e. we write

$$\tilde{p}(x_{1:T} | y_{1:T}) = \mathcal{N} \left( \begin{bmatrix} x_T \\ \vdots \\ x_1 \end{bmatrix} \middle| \begin{bmatrix} \tilde{\mu}_T \\ \vdots \\ \tilde{\mu}_1 \end{bmatrix}, \{L_T L_T^\top\}^{-1} \right),$$

where  $L_T$  is a Cholesky factor for  $\tilde{Q}$ . Denote also the lower right  $t \times t$  block of  $L_T$  as

$$L_t = \begin{bmatrix} \hat{L}_t & 0 \\ \hat{L}_{t-1,t} & L_{t-1} \end{bmatrix}.$$

Now by marginalization and conditioning on  $x_{1:t-1}$  we have

$$\tilde{p}(x_t | x_{1:t-1}, y_{1:T}) = \mathcal{N}(x_t | \tilde{\mu}_{t|t-1}, \{\hat{L}_t \hat{L}_t^\top\}^{-1}),$$

with

$$\tilde{\mu}_{t|t-1} = \tilde{\mu}_t - \frac{\hat{L}_{t-1,t}^\top}{\hat{L}_t} \left( \begin{bmatrix} x_{t-1} \\ \vdots \\ x_1 \end{bmatrix} - \begin{bmatrix} \tilde{\mu}_{t-1} \\ \vdots \\ \tilde{\mu}_1 \end{bmatrix} \right).$$

#### 4 Modified twisting functions which ensure bounded SMC weights

As noted in [5], a direct approximation of the optimal twisting function may lead to unbounded SMC weights, which may cause unstable behavior. This can often be resolved by a regularization. We review how such regularization can be applied in the setting of expectation propagation; the application in GMRF and LBP follow similar steps. Suppose that we have an approximately optimal twisting function of the form

$$\psi_t(x_{1:t}) := \int \prod_{j \in \mathcal{F} \setminus \mathcal{F}_t} \tilde{f}_j(x_{\mathcal{I}_j}) dx_{t+1:T},$$

where  $\tilde{f}_j$  form our approximate model. Now, let  $\tilde{\psi}_t(x_{1:t}) := \psi_t(x_{1:t}) + \epsilon$ , with  $\epsilon \geq 0$  being a constant ‘regularization’ factor. Let  $\gamma_t(x_{1:t}) := \prod_{j \in \mathcal{F}_t} f_j(x_{\mathcal{I}_j})$  denote the ‘untwisted’ unnormalized targets and  $\gamma_t^{\tilde{\psi}} := \gamma_t \tilde{\psi}_t$  the ‘twisted’ unnormalized targets. We may now use a proposal of the form

$$q_t(x_t | x_{1:t-1}) = [1 - \lambda_t(x_{1:t-1})] \tilde{\pi}_t(x_t | x_{1:t-1}) + \lambda_t(x_{1:t-1}) s_t(x_t | x_{1:t-1}),$$

where  $s_t(x_t | x_{1:t-1})$  is a ‘safeguard proposal’,

$$\tilde{\pi}_t(x_t | x_{1:t-1}) := \left( \prod_{j \in \mathcal{F}_t} \tilde{f}_j(x_{\mathcal{I}_j}) \right) \frac{\psi_t(x_{1:t})}{\psi_{t-1}(x_{1:t-1})}$$

is the ‘approximately optimal’ proposal, and the mixture weights  $\lambda_t(x_{1:t-1}) \in [0, 1]$  are defined as

$$\lambda_t(x_{1:t-1}) := \frac{\epsilon}{\psi_{t-1}(x_{1:t-1}) + \epsilon}.$$

The SMC weights now take the form

$$\begin{aligned} \omega_t(x_{1:t}) &= \frac{\gamma_t^{\tilde{\psi}}(x_{1:t})}{\gamma_{t-1}^{\tilde{\psi}}(x_{1:t-1})q_t(x_t | x_{1:t-1})} \\ &= \frac{\gamma_t(x_{1:t})[\psi_t(x_{1:t}) + \epsilon]}{\gamma_{t-1}(x_{1:t-1})[\prod_{j \in F_t} \tilde{f}_j(x_{\mathcal{I}_j})\psi_t(x_{1:t}) + \epsilon s_t(x_t | x_{1:t-1})]} \\ &= \frac{\prod_{j \in F_t} f_j(x_{\mathcal{I}_j})[\psi_t(x_{1:t}) + \epsilon]}{\prod_{j \in F_t} \tilde{f}_j(x_{\mathcal{I}_j})\psi_t(x_{1:t}) + \epsilon s_t(x_t | x_{1:t-1})}. \end{aligned}$$

Note that if  $\epsilon = 0$ , this reduces to the simple form stated in the main paper. But if  $\epsilon > 0$ ,  $\psi_t$  are bounded, and  $s_t$  are ‘safe’ SMC proposals for the untwisted model, that is,  $s_t(x_t | x_{1:t-1}) \geq \delta \prod_{j \in F_t} f_j(x_{\mathcal{I}_j})$  for some  $\delta > 0$ , then the SMC weights  $\omega_t$  are bounded.

## 5 Unbiasedness of the normalizing constant estimate

It is well known that the SMC normalizing constant estimate is unbiased, i.e.,  $\mathbb{E}[\hat{Z}_t] = Z_t$ ; see, e.g., [2, 12, 8, 7]. However, there are many (equivalent) formulations of generic SMC algorithms presented in the literature, and therefore also many (equivalent) expressions for the normalizing constant estimate. For instance, the estimator is sometimes explicitly modified to take ESS-based resampling into account [3, 12], and sometimes it is expressed in terms of so called adjustment multiplier weights [7]. However, the simple form of the normalizing constant estimator

$$\hat{Z}_t = \prod_{s=1}^t \left\{ \frac{1}{N} \sum_{i=1}^N \tilde{w}_s^i \right\} \quad (7)$$

is in fact valid for any instance of Algorithm 1 (see the main paper), *as long as the unnormalized weights  $\tilde{w}_t^i$  are computed as stated in the algorithm*:

$$\tilde{w}_t^i = \omega_t(x_{1:t}^i) w_{t-1}^{a_t^i} / \nu_{t-1}^{a_t^i}$$

with  $\omega_t(x_{1:t}) = \gamma_t(x_{1:t}) / (\gamma_{t-1}(x_{1:t-1})q_t(x_t | x_{1:t-1}))$ , for  $t \geq 2$ ,  $\tilde{w}_1^i = \gamma_1(x_1^i) / q_1(x_1^i)$  and  $w_t^i = \tilde{w}_t^i / \sum_{j=1}^N \tilde{w}_t^j$ . In particular, as argued in the main paper this includes ESS-based resampling: set the resampling probabilities  $\nu_{t-1}^i \equiv 1/N$  and use a low-variance resampling method whenever the ESS is above the resampling threshold, which effectively turns the resampling off.<sup>3</sup> We can thus use the simple expression (7) also in such situations.

For completeness we therefore provide a proof of the unbiasedness of (7) (for any instance of Algorithm 1 of the main paper) below. The proof itself is not new and closely follows [8, 7].

Let  $\mathcal{G}_t = \sigma(\{x_1^i\}_{i=1}^N, \{x_s^i, a_s^i\}_{i=1}^N : s = 2, \dots, t)$  denote the filtration generated by all random variables simulated in Algorithm 1 up until iteration  $t$ . We assume that the resampling probabilities  $\{\nu_{t-1}^i\}_{i=1}^N$  used at iteration  $t$  are  $\mathcal{G}_{t-1}$ -measurable and that the resampling method is unbiased:

$$\mathbb{E} \left[ \sum_{i=1}^N \mathbb{1}(a_t^i = j) \middle| \mathcal{G}_{t-1} \right] = N \nu_{t-1}^j, \quad j = 1, \dots, N. \quad (8)$$

Let  $t$  be a fixed index and define recursively the functions  $f_t(x_{1:t}) \equiv 1$  and

$$f_s(x_{1:s}) = \frac{\int f_{s+1}(x_{1:s+1}) \gamma_{s+1}(x_{1:s+1}) dx_{s+1}}{\gamma_s(x_{1:s})}$$

<sup>3</sup>In a practical implementation it is of course more efficient to skip the resampling step when the ESS is above the threshold. However, this interpretation is useful for the sake of analysis, since it means that we do not need to treat the case with ESS-triggered resampling separately.

for  $s = t - 1, t - 2, \dots, 1$ . Let

$$Q_s = \left( \frac{1}{N} \sum_{i=1}^N \tilde{w}_s^i f_s(x_{1:s}^i) \right) \prod_{u=1}^{s-1} \left\{ \frac{1}{N} \sum_{i=1}^N \tilde{w}_u^i \right\}$$

for  $s = 1, \dots, t$ . Note that  $Q_t = \hat{Z}_t$ .

Now, for  $2 \leq s \leq t$ , consider

$$\mathbb{E}[Q_s | \mathcal{G}_{s-1}] = \mathbb{E} \left[ \frac{1}{N} \sum_{i=1}^N \tilde{w}_s^i f_s(x_{1:s}^i) \middle| \mathcal{G}_{s-1} \right] \times \prod_{u=1}^{s-1} \left\{ \frac{1}{N} \sum_{i=1}^N \tilde{w}_u^i \right\}$$

where the first factor of the right-hand-side can be written as

$$\begin{aligned} & \mathbb{E} \left[ \frac{1}{N} \sum_{i=1}^N \frac{w_{s-1}^{a_s^i}}{\nu_{s-1}^{a_s^i}} \int \omega_s((x_{1:s-1}^{a_s^i}, x_s)) f_s((x_{1:s-1}^{a_s^i}, x_s)) q(x_s | x_{1:s-1}^{a_s^i}) dx_s \middle| \mathcal{G}_{s-1} \right] \\ &= \sum_{j=1}^N \frac{w_{s-1}^j}{\nu_{s-1}^j} f_{s-1}(x_{1:s-1}^j) \times \mathbb{E} \left[ \frac{1}{N} \sum_{i=1}^N \mathbb{1}(a_s^i = j) \middle| \mathcal{G}_{s-1} \right] = \sum_{j=1}^N w_{s-1}^j f_{s-1}(x_{1:s-1}^j) \end{aligned}$$

and where we have used (8) for the last equality. It follows that

$$\mathbb{E}[Q_s | \mathcal{G}_{s-1}] = \sum_{i=1}^N \frac{\tilde{w}_{s-1}^i}{\sum_{j=1}^N \tilde{w}_{s-1}^j} f_{s-1}(x_{1:s-1}^i) \times \prod_{u=1}^{s-1} \left\{ \frac{1}{N} \sum_{i=1}^N \tilde{w}_u^i \right\} = Q_{s-1}.$$

Thus,  $\{Q_s : s = 1, \dots, t\}$  is a  $\mathcal{G}_s$ -martingale, so

$$\begin{aligned} \mathbb{E}[\hat{Z}_t] &= \mathbb{E}[Q_t] = \mathbb{E}[Q_1] = \int \omega_1(x_1) f_1(x_1) q_1(x_1) dx_1 = \int \gamma_1(x_1) f_1(x_1) dx_1 \\ &= \int \gamma_2(x_{1:2}) f_2(x_{1:2}) dx_{1:2} = \dots = \int \gamma_t(x_{1:t}) f_t(x_{1:t}) dx_{1:t} = Z_t. \end{aligned}$$

## References

- [1] C. M. Bishop. *Pattern Recognition and Machine Learning*. Information Science and Statistics. Springer, New York, USA, 2006.
- [2] P. Del Moral. *Feynman-Kac Formulae - Genealogical and Interacting Particle Systems with Applications*. Probability and its Applications. Springer, 2004.
- [3] P. Del Moral, A. Doucet, and A. Jasra. Sequential Monte Carlo samplers. *Journal of the Royal Statistical Society: Series B*, 68(3):411–436, 2006.
- [4] J. Durbin and S. J. Koopman. *Time series analysis by state space methods*. Oxford University Press, New York, 2nd edition, 2012.
- [5] P. Guarniero, A. M. Johansen, and A. Lee. The iterated auxiliary particle filter. *Journal of the American Statistical Association*, 112(520):1636–1647, 2017.
- [6] T. Minka and J. Lafferty. Expectation-propagation for the generative aspect model. In *Proceedings of the 18th Conference on Uncertainty in Artificial Intelligence (UAI)*, 2002.
- [7] C. A. Naesseth, F. Lindsten, and T. B. Schön. Sequential Monte Carlo methods for graphical models. In *Advances in Neural Information Processing Systems (NIPS) 27*, pages 1862–1870. 2014.
- [8] M. K. Pitt, R. S. Silva, P. Giordani, and R. Kohn. On some properties of Markov chain Monte Carlo simulation methods based on the particle filter. *Journal of Econometrics*, 171:134–151, 2012.
- [9] H. Rue and L. Held. *Gaussian Markov Random Fields: Theory And Applications (Monographs on Statistics and Applied Probability)*. Chapman & Hall/CRC, 2005. ISBN 1584884320.
- [10] M. Vihola, J. Helske, and J. Franks. Importance sampling type estimators based on approximate marginal MCMC. arXiv.org, arXiv:1609.02541, 2018.
- [11] H. M. Wallach, I. Murray, R. Salakhutdinov, and D. Mimno. Evaluation methods for topic models. In *Proceedings of the 26th International Conference on Machine Learning*, 2009.
- [12] N. Whiteley, A. Lee, and K. Heine. On the role of interaction in sequential Monte Carlo algorithms. *Bernoulli*, 22(1):494–529, 2016.
